# Supplementary material for: Hydroxytyrosol–Donepezil Hybrids Play a Protective Role in an In Vitro Induced Alzheimer’s Disease Model and in Neuronal Differentiated Human SH-SY5Y Neuroblastoma Cells
Source: MDPI journal article supplement (doi:10.3390/ijms241713461), 2023-08-30
Supplement: s1 [file s1]

Supplementary Table 1. Effect of the HT hybrids on acetylcholinesterase, butyryl-cholinesterase and BACE-1 activity.

|                           | <b>AChE</b>               |                             |  | <b>BuChE</b>              |                             |  | <b>BACE-1</b>             |                             |
|---------------------------|---------------------------|-----------------------------|--|---------------------------|-----------------------------|--|---------------------------|-----------------------------|
| <b>HT hybrid</b>          | <b>Concentration (μM)</b> | <b>IC<sub>50</sub> (μM)</b> |  | <b>Concentration (μM)</b> | <b>IC<sub>50</sub> (μM)</b> |  | <b>Concentration (μM)</b> | <b>IC<sub>50</sub> (μM)</b> |
| HT1                       | 2.5 – 5.0                 | 6.5 ± 0.8                   |  | 5 – 10                    | 20.3 ± 2.4                  |  | 2.5 – 25                  | 11.3 ± 1.2                  |
| HT1a                      | 2.5 – 5.0                 | 4.3 ± 0.7                   |  | 1.5 – 10                  | 4.2 ± 0.4                   |  | 2.5 – 25                  | 16.9 ± 0.1                  |
| HT2                       | 2.5 – 5.0                 | 3.8 ± 0.3                   |  | 5 – 10                    | 31.8 ± 5.7                  |  | 2.5 – 25                  | 128.0 ± 42.0                |
| HT3                       | 2.5 – 5.0                 | 4.0 ± 0.4                   |  | 5 – 10                    | 7.2 ± 0.9                   |  | 2.5 – 25                  | 76.8 ± 3.0                  |
| HT3a                      | 2.5 – 5.0                 | 2.6 ± 0.2                   |  | 2.5 – 5                   | 4.3 ± 0.9                   |  | 2.5 – 25                  | 19.7 ± 0.7                  |
| HT4                       | 2.5 – 5.0                 | 4.9 ± 0.5                   |  | 5 – 10                    | 22.9 ± 7.1                  |  | 2.5 – 25                  | 52.2 ± 2.1                  |
| HT4a                      | 2.5 – 5.0                 | 2.9 ± 0.2                   |  | 2.5 – 5                   | 4.1 ± 0.5                   |  | 2.5 – 25                  | 115.0 ± 5.1                 |
| Donepezil                 | 0.01 – 0.1                | 0.01 ± 0.005                |  | 2.5 – 5                   | 1.3 ± 0.4                   |  | 0.1 – 0.5                 | 0.18 ± 0.04                 |
| Inhibitor I <sup>b</sup>  | –                         | –                           |  | –                         | –                           |  | 0.5 – 5.5                 | 1.27 ± 0.44                 |
| Inhibitor IV <sup>b</sup> | –                         | –                           |  | –                         | –                           |  | 0.1 – 0.5                 | 0.12 ± 0.05                 |

<sup>a</sup> C: competitive; NC: non competitive; U: uncompetitive; M: mixed

<sup>b</sup> Known inhibitor of BACE-1 activity

Values are expressed as mean ± SD calculated on three, and four different determinations for ChE, and BACE-1, respectively

Supplementary Table 2. Inhibition by HT hybrids on the A $\beta$  fibril formation.

| <b>HT hybrid</b> | <b>Concentration<br/>(<math>\mu</math>M)</b> | <b>IC<sub>50</sub><br/>(<math>\mu</math>M)</b> |
|------------------|----------------------------------------------|------------------------------------------------|
| HT1              | 20 – 240                                     | 375.0 $\pm$ 142.8                              |
| HT1a             | 20 – 240                                     | 106.4 $\pm$ 11.1                               |
| HT2              | 20 – 240                                     | 417.6 $\pm$ 41.1                               |
| HT3              | 20 – 500                                     | n.d. <sup>a</sup>                              |
| HT3a             | 20 – 500                                     | n.d. <sup>a</sup>                              |
| HT4              | 20 – 500                                     | n.d. <sup>a</sup>                              |
| HT4a             | 20 –                                         | n.d. <sup>a</sup>                              |
| Donepezil        | 20 – 240                                     | 183.8 $\pm$ 14.7                               |

<sup>a</sup> Inhibition not detectable up to the maximum concentration used

Values are expressed as mean  $\pm$  SD calculated on three different determinations
